# Supplementary material for: Solid-state emission enhancement in vaulted trans-bis(salicylaldiminato)platinum(ii) crystals with halogen functionality
Source: Royal Society of Chemistry journal article supplement (doi:10.1039/c4dt00560k), 2014-01-01
Supplement: c4dt00560k1.pdf [file c4dt00560k1.pdf]

## Supplementary Information

### **Solid-State Emission Enhancement in Vaulted *trans*-Bis(salicylaldiminato)platinum(II) Crystals with Halogen Functionality**

Naruyoshi Komiya, Minoru Okada, Kanako Fukumoto, Shotaro Iwata and Takeshi Naota\*

*Department of Chemistry, Graduate School of Engineering Science, Osaka University,  
Machikaneyama, Toyonaka, Osaka 560-8531, Japan*

#### Contents

|                 |                                                                                                                                   |    |
|-----------------|-----------------------------------------------------------------------------------------------------------------------------------|----|
| <b>Table S1</b> | Photophysical data of <b>1–4</b> in 2-MeTHF                                                                                       | S2 |
| <b>Table S2</b> | Photophysical data of <b>1g</b> , <b>2g</b> , and <b>3g</b> in crystalline state                                                  | S3 |
| <b>Fig. S1</b>  | Frontier orbitals and their eigenvalues for complexes <b>3a–d</b> .                                                               | S4 |
| <b>Table S3</b> | Excitation energy, oscillator strength and major electronic configuration of <b>3a–d</b> .                                        | S5 |
| <b>Fig. S2</b>  | Relationship between the T <sub>1</sub> –S <sub>0</sub> energy gap and $\lambda_{\text{max}}$ for <b>3a–d</b> in 2-MeTHF at 77 K. | S7 |

**Table S1** Photophysical data of **1–4** in 2-MeTHF<sup>a</sup>

| complex   | $\lambda_{\text{abs}}$ (nm) | $\lambda_{\text{em}}$ (nm) <sup>b,c</sup> | $\Phi$ <sup>b,c,d</sup> |
|-----------|-----------------------------|-------------------------------------------|-------------------------|
| <b>1b</b> | 317, 432                    | — <sup>e</sup> (530, 561)                 | <0.01 (0.42)            |
| <b>2b</b> | 317, 430                    | — <sup>e</sup> (529, 563)                 | <0.01 (0.45)            |
| <b>3a</b> | 332, 436                    | 534 (519, 561)                            | <0.01 (0.61)            |
| <b>3b</b> | 317, 430                    | — <sup>e</sup> (521, 562)                 | <0.01 (0.57)            |
| <b>3c</b> | 336, 457                    | — <sup>e</sup> (538, 582)                 | <0.01 (0.53)            |
| <b>3d</b> | 338, 447                    | 552 (538, 582)                            | <0.01 (0.48)            |
| <b>3e</b> | 307, 420                    | — <sup>e</sup> (511, 541)                 | <0.01 (0.58)            |
| <b>3f</b> | 319, 333, 435               | — <sup>e</sup> (520, 558)                 | <0.01 (0.58)            |
| <b>4b</b> | 317, 332, 430               | — <sup>e</sup> (515, 552)                 | <0.01 (0.66)            |

<sup>a</sup>A  $2 \times 10^{-4}$  M solution in 2-MeTHF at 298 K. <sup>b</sup> $\lambda_{\text{ex}} = 420$  nm. <sup>c</sup>Values in parentheses are those measured at 77 K. <sup>d</sup>Determined by the absolute method by using an integrating sphere. <sup>e</sup>No emission.

**Table S2** Photophysical data of **1g**, **2g**, and **3g** in crystalline state<sup>a</sup>

| complex                | $\lambda_{\text{abs}}$ (nm) | $\lambda_{\text{em}}$ (nm) | $\Phi^b$     | $\tau$ ( $\mu\text{s}$ ) <sup>c</sup> | CIE (x,y)      |
|------------------------|-----------------------------|----------------------------|--------------|---------------------------------------|----------------|
| <b>1g</b> <sup>d</sup> | 319, 443, 511               | — <sup>e</sup>             | <0.01 (0.18) | — <sup>e</sup>                        | — <sup>e</sup> |
| <b>2g</b> <sup>d</sup> | 324, 441, 522               | 558, 582                   | <0.01 (0.60) | — <sup>e</sup>                        | 0.50, 0.50     |
| <b>3g</b> <sup>d</sup> | 319, 441, 528               | 564, 585                   | 0.32 (0.51)  | 1.7                                   | 0.51, 0.48     |

<sup>a</sup>Data obtained at 298 K under excitation at 420 nm. All crystals were obtained by recrystallization from EtOH. <sup>b</sup>Determined by the absolute method using an integrating sphere. Values in parentheses are those measured at 77 K. <sup>c</sup> $\lambda_{\text{ex}}=435$  nm. <sup>d</sup>Racemic crystal. <sup>e</sup>No emission.

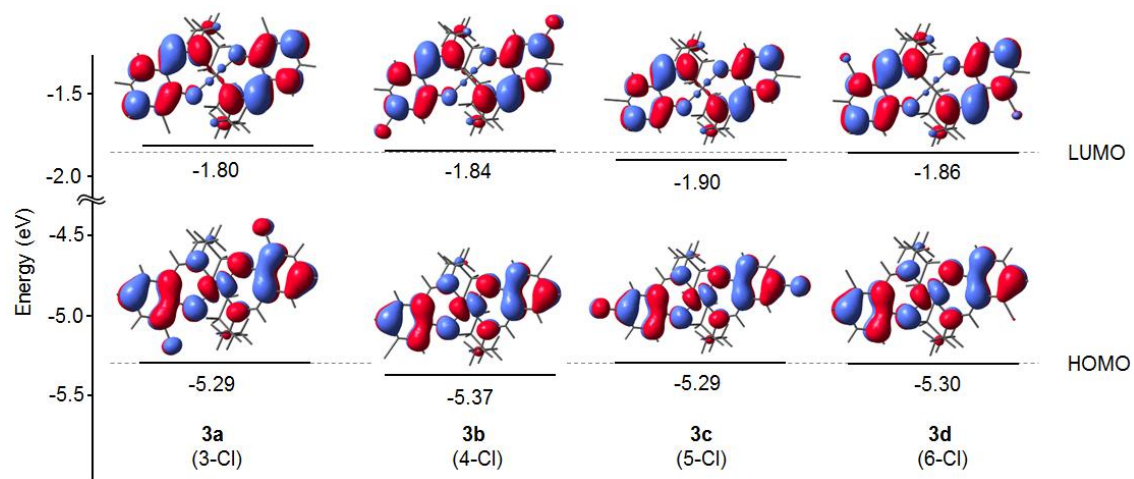

**Fig. S1.** Frontier orbitals and their eigenvalues (eV) for **3a–d** estimated from DFT calculations (B3LYP/6-31G\*, LanL2DZ) on the basis of optimized structures.

**Table S3** Excitation energy, oscillator strength and major electronic configuration of **3a-d**<sup>a</sup>

| complex   | state         | excitation energy / eV | oscillator strength | major configuration <sup>b</sup> | coefficient |          |
|-----------|---------------|------------------------|---------------------|----------------------------------|-------------|----------|
| <b>3a</b> | Singlet       |                        |                     |                                  |             |          |
|           | 1             | 2.8307                 | f = 0.0363          | 135→136                          | 0.69500     |          |
|           | 2             | 3.0924                 | 0.0006              | 135→137                          | 0.69573     |          |
|           | 3             | 3.1208                 | 0.0021              | 135→138                          | 0.67582     |          |
|           | 4             | 3.3460                 | 0.0005              | 134→136                          | 0.69721     |          |
|           | Triplet       |                        |                     |                                  |             |          |
|           | 1             | 2.3459                 |                     |                                  | 134→137     | -0.21880 |
|           |               |                        |                     |                                  | 135→136     | 0.64943  |
|           | 2             | 2.5175                 |                     |                                  | 131→136     | -0.10497 |
|           |               |                        |                     |                                  | 134→136     | -0.34839 |
|           |               |                        |                     |                                  | 135→137     | 0.59239  |
|           |               |                        |                     |                                  | 128→138     | 0.13985  |
|           | 3             | 2.7422                 |                     |                                  | 130→138     | 0.23947  |
|           |               |                        |                     |                                  | 135→138     | 0.63353  |
|           |               |                        |                     |                                  | 131→137     | -0.29064 |
|           |               |                        |                     |                                  | 133→136     | 0.55896  |
| 4         | 3.0102        |                        |                     | 134→137                          | 0.15145     |          |
|           |               |                        |                     |                                  |             |          |
| <b>3b</b> | Singlet       |                        |                     |                                  |             |          |
|           | 1             | 2.8686                 | f = 0.0374          | 135→136                          | 0.69546     |          |
|           | 2             | 3.1518                 | 0.0007              | 135→137                          | 0.69537     |          |
|           | 3             | 3.1939                 | 0.0017              |                                  | 130→138     | 0.16150  |
|           |               |                        |                     |                                  | 135→138     | 0.67864  |
|           | 4             | 3.3531                 | 0.0010              |                                  | 132→138     | 0.11633  |
|           |               |                        |                     |                                  | 134→136     | 0.69015  |
|           | Triplet state |                        |                     |                                  |             |          |
|           | 1             | 2.3812                 |                     |                                  | 134→137     | -0.22414 |
|           |               |                        |                     |                                  | 135→136     | 0.64983  |
|           | 2             | 2.5516                 |                     |                                  | 134→136     | -0.34232 |
|           |               |                        |                     |                                  | 135→137     | 0.59727  |
|           | 3             | 2.7441                 |                     |                                  | 130→138     | 0.26203  |
|           |               |                        |                     |                                  | 135→138     | 0.63964  |
|           | 4             | 3.0880                 |                     |                                  | 131→137     | -0.30207 |
|           |               |                        |                     |                                  | 133→136     | 0.56927  |
| 135→136   |               |                        |                     |                                  | 0.11871     |          |

<sup>a</sup> Estimated from TD-DFT (B3LYP/6-31G\*, LanL2DZ) calculations on the basis of optimized structures.<sup>b</sup> HOMO is MO135.

**Table S3** (continued)

| complex   | state         | excitation energy / eV | oscillator strengt | major configuration <sup>b</sup> | coefficient |
|-----------|---------------|------------------------|--------------------|----------------------------------|-------------|
| <b>3c</b> | Singlet state |                        |                    |                                  |             |
|           | 1             | 2.7540                 | f = 0.0344         | 135→136                          | 0.69558     |
|           | 2             | 3.0422                 | 0.0008             | 135→137                          | 0.69618     |
|           | 3             | 3.1587                 | 0.0018             | 131→138                          | 0.17643     |
|           |               |                        |                    | 135→138                          | 0.67514     |
|           | 4             | 3.2703                 | 0.0010             | 134→136                          | 0.69824     |
|           | Triplet state |                        |                    |                                  |             |
|           | 1             | 2.2470                 |                    | 134→137                          | -0.23738    |
|           |               |                        |                    | 135→136                          | 0.65259     |
|           | 2             | 2.4093                 |                    | 134→136                          | -0.36831    |
|           |               |                        |                    | 135→137                          | 0.59023     |
|           | 3             | 2.7202                 |                    | 131→138                          | 0.28459     |
|           |               |                        |                    | 135→138                          | 0.63195     |
|           | 4             | 3.0908                 |                    | 130→137                          | 0.27026     |
| 133→136   |               |                        |                    | 0.55153                          |             |
| 134→140   |               |                        |                    | 0.15619                          |             |
|           |               |                        | 135→139            | -0.17529                         |             |
| <b>3d</b> | Singlet state |                        |                    |                                  |             |
|           | 1             | 2.7825                 | f = 0.0330         | 135→136                          | 0.69841     |
|           | 2             | 3.0699                 | 0.0006             | 135→137                          | 0.69703     |
|           | 3             | 3.2857                 | 0.0010             | 130→138                          | 0.14535     |
|           |               |                        |                    | 135→138                          | 0.67866     |
|           | 4             | 3.3994                 | 0.0004             | 134→136                          | 0.69638     |
|           | Triplet state |                        |                    |                                  |             |
|           | 1             | 2.2972                 |                    | 134→137                          | -0.21844    |
|           |               |                        |                    | 135→136                          | 0.65719     |
|           | 2             | 2.4706                 |                    | 134→136                          | -0.33711    |
|           |               |                        |                    | 135→137                          | 0.60476     |
|           | 3             | 2.7898                 |                    | 130→138                          | 0.23935     |
|           |               |                        |                    | 135→138                          | 0.64288     |
|           | 4             | 2.9985                 |                    | 131→137                          | 0.29142     |
| 133→136   |               |                        |                    | 0.56404                          |             |
| 134→137   |               |                        |                    | -0.14392                         |             |

<sup>a</sup> Estimated from TD-DFT (B3LYP/6-31G\*, LanL2DZ) calculations on the basis of optimized structures.<sup>b</sup> HOMO is MO135.

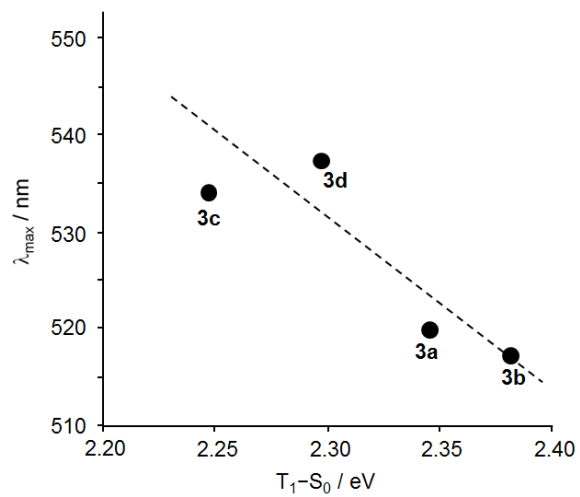

**Fig. S2.** Relationship between the  $T_1-S_0$  energy gap and emission maxima ( $\lambda_{\max}$ ) for **3a-d** in 2-MeTHF at 77 K. The energy gap was estimated from TD-DFT calculations (B3LYP/6-31G\*, LanL2DZ) on the basis of optimized structures.
